# Supplementary material for: Yttrium doping stabilizes the structure of Ni3(NO3)2(OH)4 cathodes for application in advanced Ni–Zn batteries
Source: Royal Society of Chemistry journal article supplement (doi:10.1039/d4nr02011a), 2024-01-01
Supplement: d4nr02011a1.pdf [file d4nr02011a1.pdf]

## Yttrium Doping Stabilizes the Structure of $\text{Ni}_3(\text{NO}_3)_2(\text{OH})_4$ Cathodes for Application in Advanced Ni-Zn Batteries

Xinyu Feng <sup>a</sup>, Siwen Zhang <sup>a</sup>, Jiazhuo Li <sup>a</sup>, Yingfang Hu <sup>a</sup>, Rongyuan Ge <sup>a</sup>, Yaowen Shi <sup>a</sup>, Yali Yao <sup>b</sup>,  
Bosi Yin <sup>a,\*</sup> and Tianyi Ma <sup>c,\*</sup>

The energy density ( $E$ , Wh/kg) and power density ( $P$ , W/kg) of the devices were calculated using the following formula:

$$E = \int IVdt/m \quad (1)$$

$$P = E / \Delta t \quad (2)$$

Where  $I$  was the discharging current,  $V$  was the discharging voltage,  $dt$  was the time differential,  $m$  was the total mass of the active electrode materials,  $\Delta t$  was the discharging time.

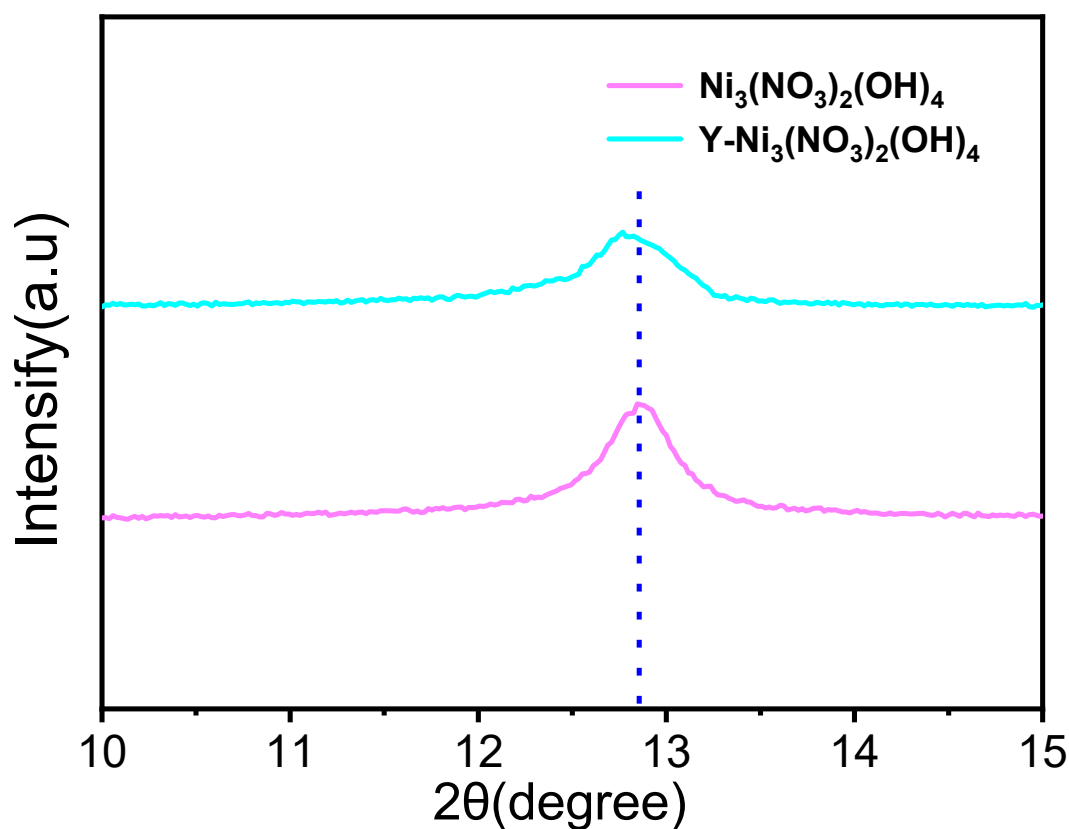

**Figure S1.** Part of the XRD patterns of  $\text{Ni}_3(\text{NO}_3)_2(\text{OH})_4$  and  $\text{Y-Ni}_3(\text{NO}_3)_2(\text{OH})_4$ .

| <b>Materials</b>                                                    | <b>Y(at%)</b> | <b>Ni(at%)</b> | <b>Y:Ni</b>  |
|---------------------------------------------------------------------|---------------|----------------|--------------|
| <b>Y-Ni<sub>3</sub>(NO<sub>3</sub>)<sub>2</sub>(OH)<sub>4</sub></b> | <b>2.41</b>   | <b>31.73</b>   | <b>7.59%</b> |

Table 1. Determine the atomic ratio of Y to Ni in Y-Ni<sub>3</sub>(NO<sub>3</sub>)<sub>2</sub>(OH)<sub>4</sub> by EDS.

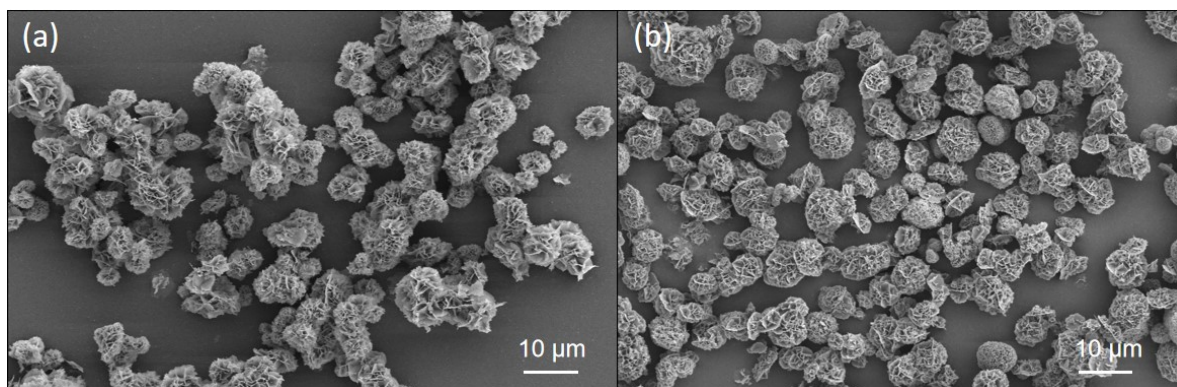

**Figure S2.** (a) SEM images of  $\text{Ni}_3(\text{NO}_3)_2(\text{OH})_4$ , (b) SEM images of  $\text{Y-Ni}_3(\text{NO}_3)_2(\text{OH})_4$ .

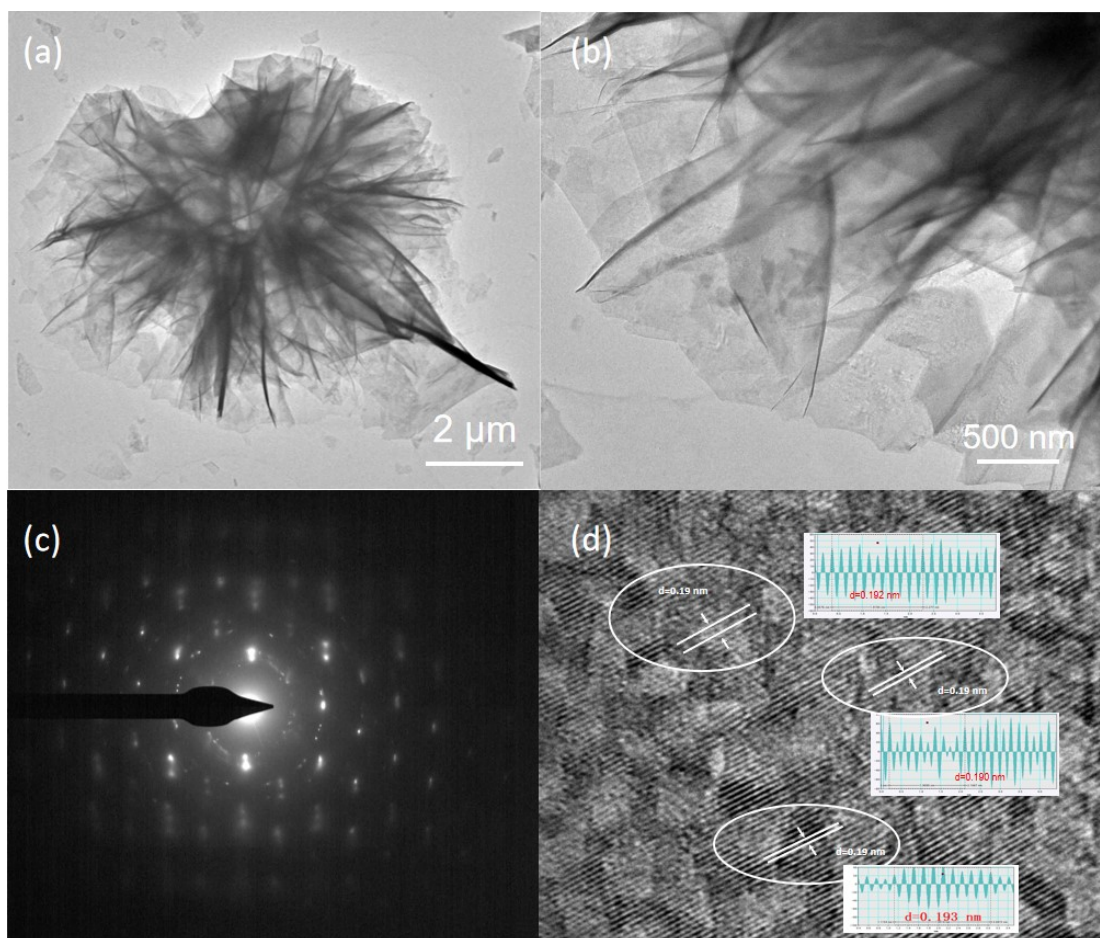

**Figure S3.** (a-b)TEM images of  $\text{Ni}_3(\text{NO}_3)_2(\text{OH})_4$ , (c)SAED pattern of  $\text{Ni}_3(\text{NO}_3)_2(\text{OH})_4$ , (d) HRTEM of  $\text{Ni}_3(\text{NO}_3)_2(\text{OH})_4$ .

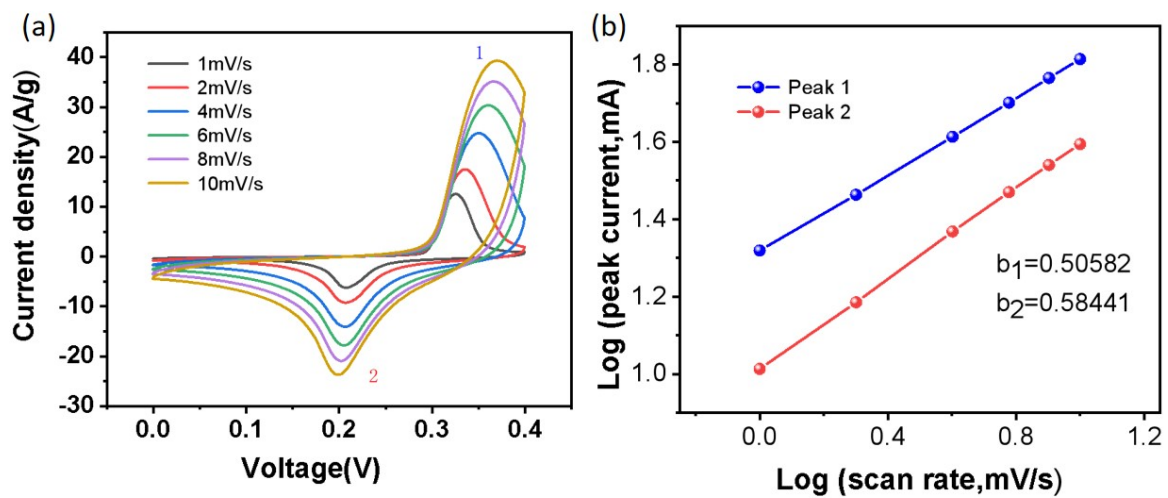

**Figure S4.** (a) CV curves of the Y-Ni<sub>3</sub>(NO<sub>3</sub>)<sub>2</sub>(OH)<sub>4</sub> electrodes at different scan rates, (b) Relationship of Y-Ni<sub>3</sub>(NO<sub>3</sub>)<sub>2</sub>(OH)<sub>4</sub> between log (*i*) and log (*v*).

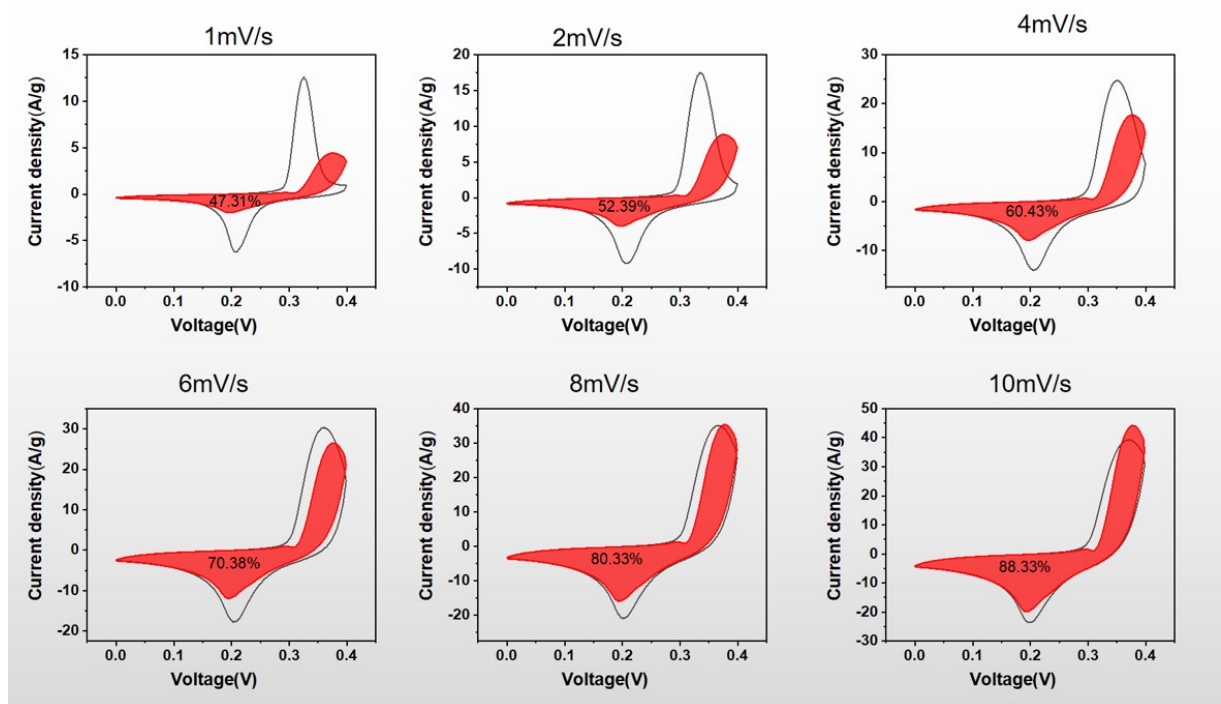

**Figure S5.** Capacitive contributions of  $\text{Ni}_3(\text{NO}_3)_2(\text{OH})_4$  at different scan rates.

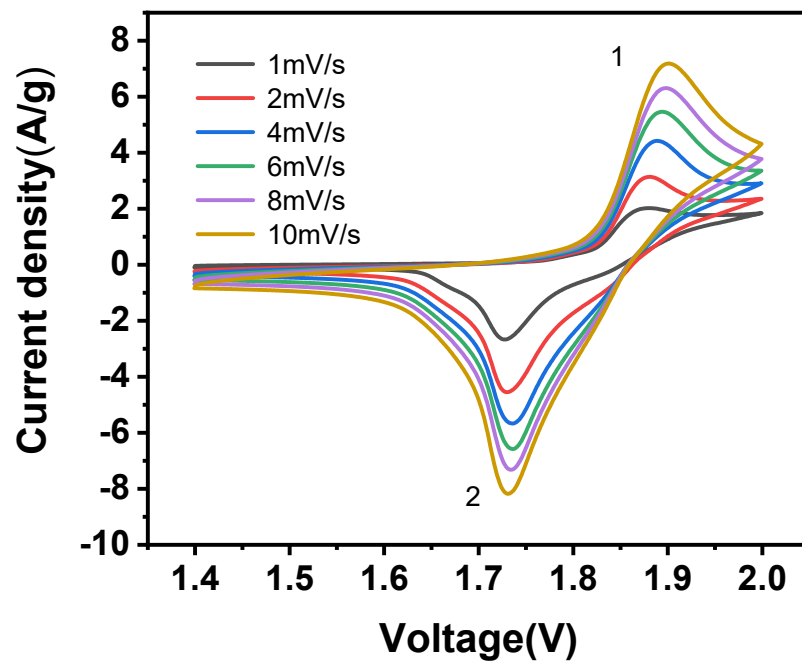

**Figure S6.** CV curves of the  $\text{Ni}_3(\text{NO}_3)_2(\text{OH})_4/\text{Zn}$  battery electrodes at different scan rates.

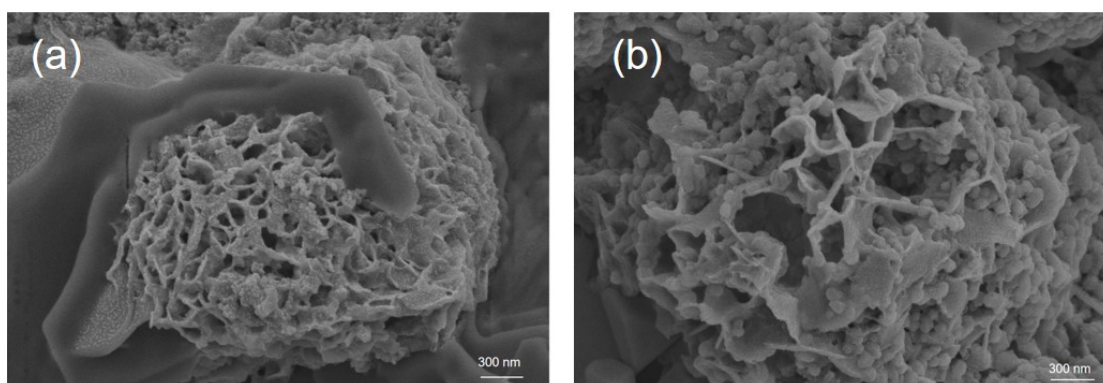

**Figure S7.** SEM of  $\text{Y-Ni}_3(\text{NO}_3)_2(\text{OH})_4$  after 100 charge-discharge cycles at 1 A/g.



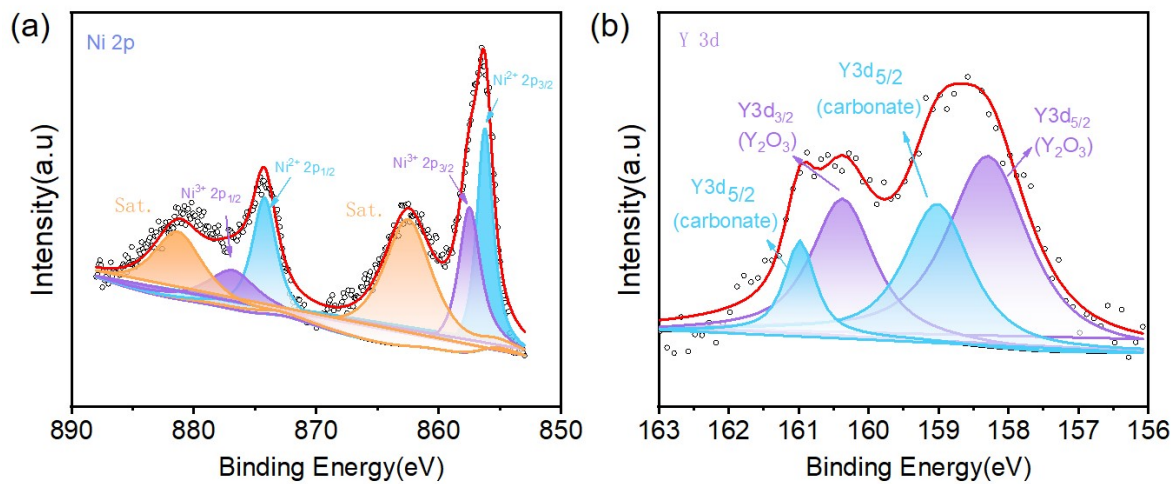

**Figure S8.** XPS of Y-Ni<sub>3</sub>(NO<sub>3</sub>)<sub>2</sub>(OH)<sub>4</sub> after 100 charge-discharge cycles at 1 A/g.
